# Supplementary material
Source: MDPI journal article supplement (https://www.mdpi.com/2571-550X/2/4/33)

**Araucinoïd = 0.3626**

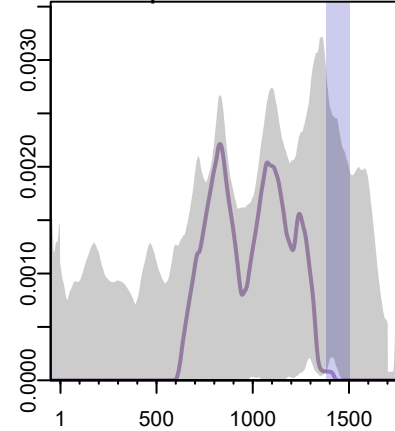

**Marajoara = 0.1942**

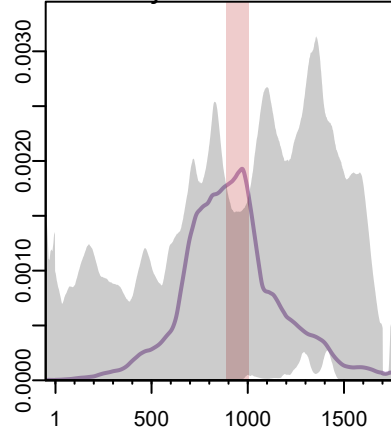

**Paredão = 0.0564**

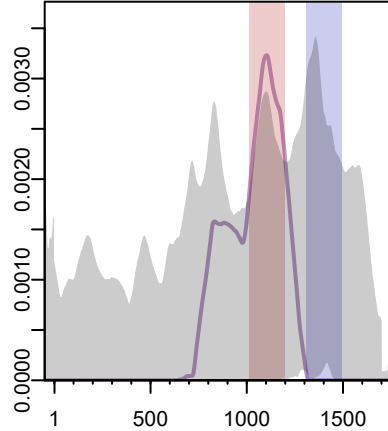

**Geoglyph = 0.0001**

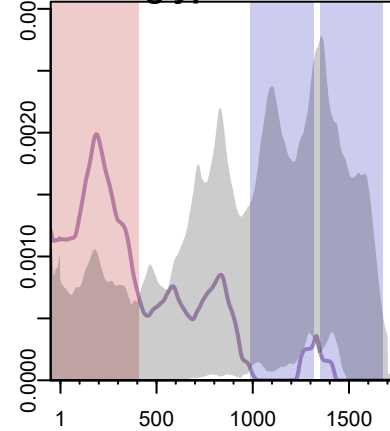

**Loma = 0.0162**

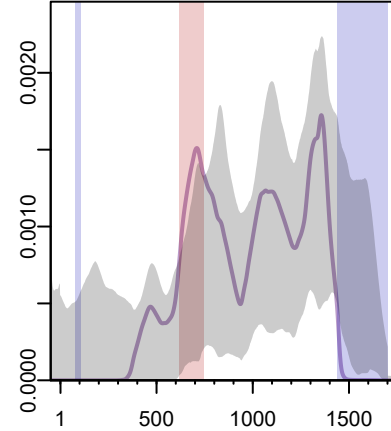

**Koriabo = 0.0002**

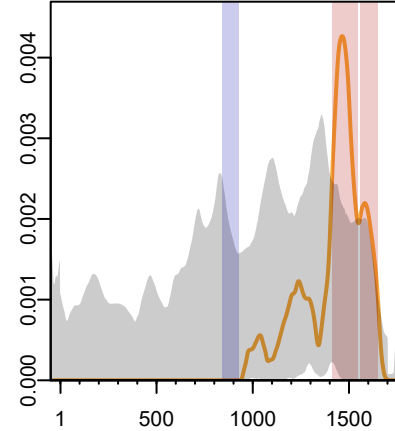

**Santarém = 0.0001**

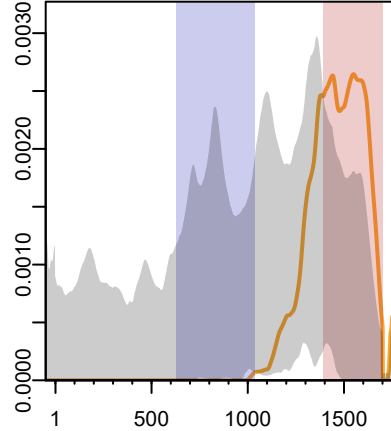

**Guarita = 0.2823**

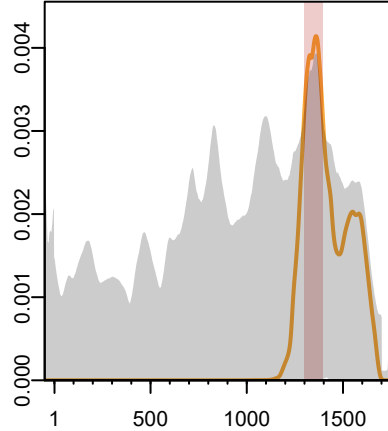

**Mound village = 0.4604**

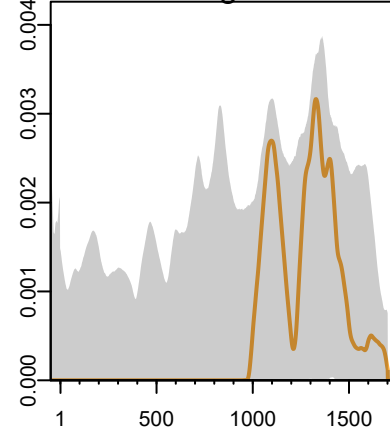

**Zanja = 0.1196**

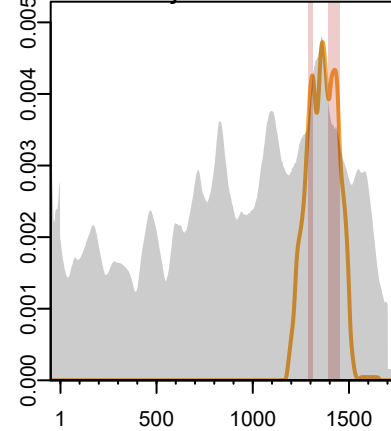

**Xinguano = 1**

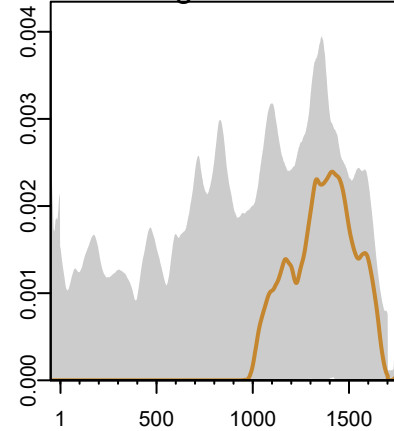

Supplement: s1 [file s1]
