# Supplementary material
Source: MDPI journal article supplement (https://www.mdpi.com/2571-550X/2/4/33)

**Guianas Coast**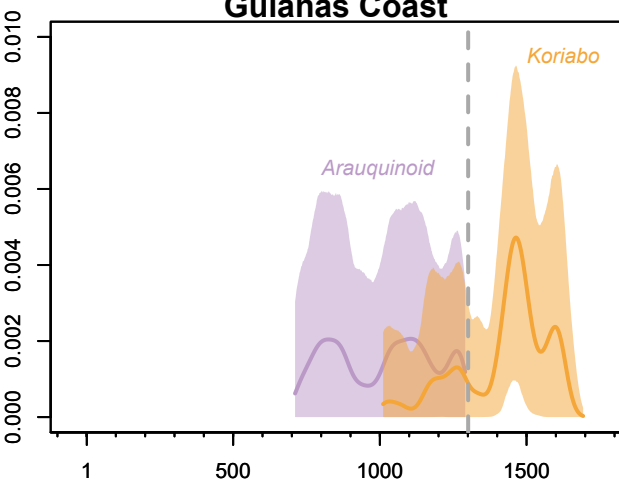**Eastern Amazon**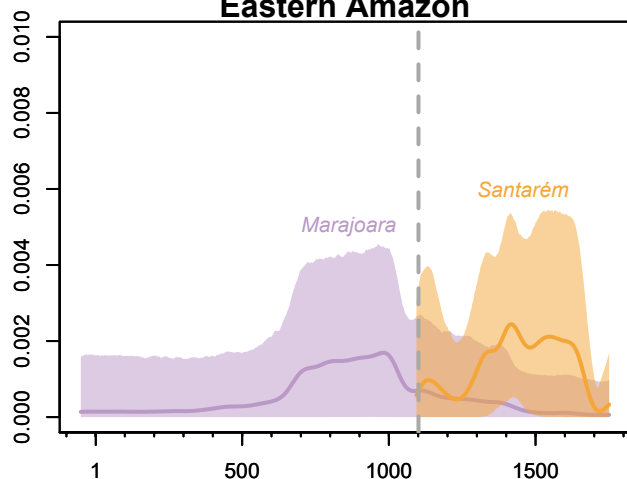**Central Amazon**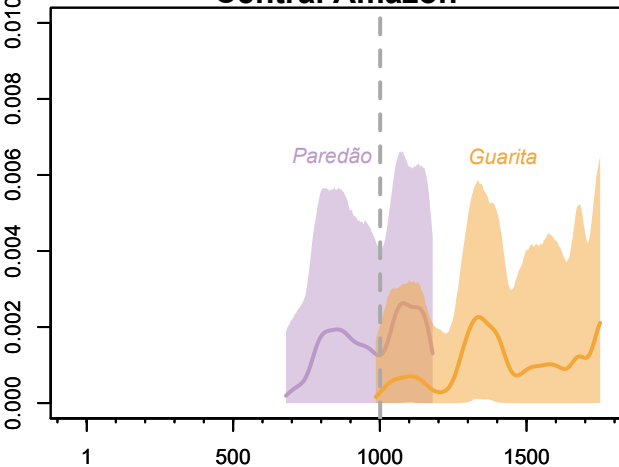**Southwestern Amazon**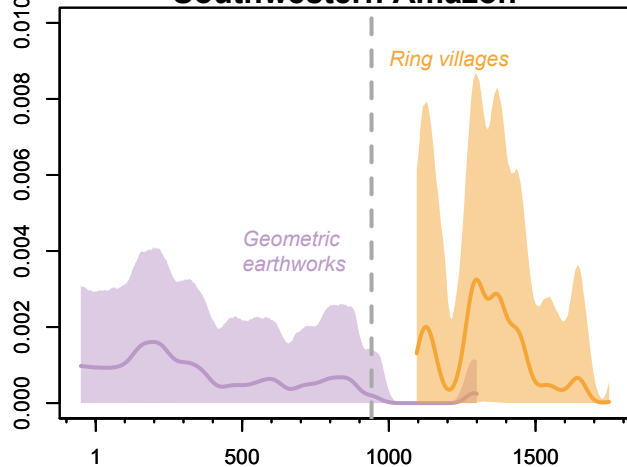**Llanos de Moxos**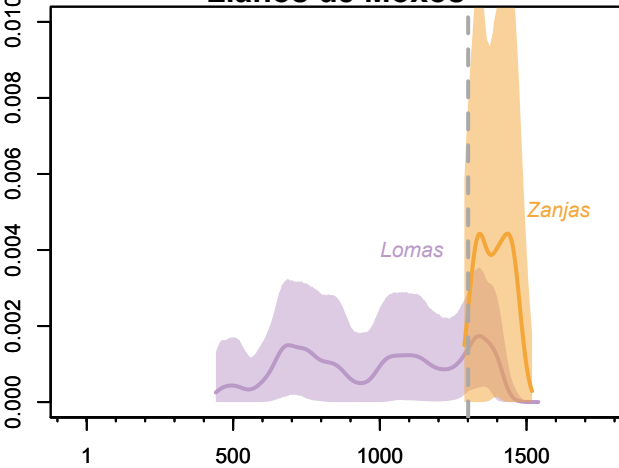**Southern Amazon**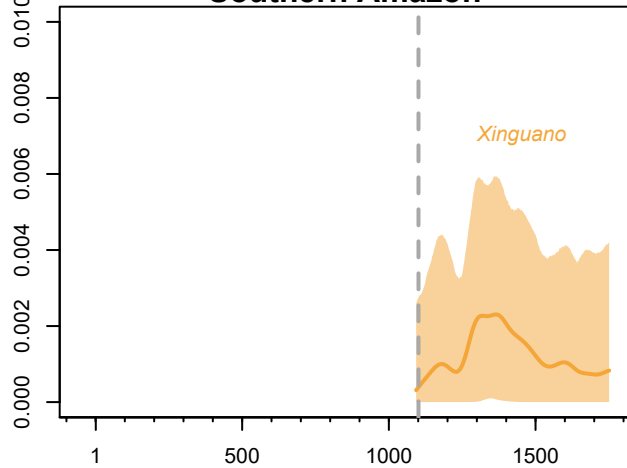

Supplement: s1 [file s1]
